# Supplementary material
Source: PubMed Central journal article supplement (PMC2766779)
Supplement: NIHMS114709-supplement-02.pdf [file NIHMS114709-supplement-02.pdf]

1

2 **Table IE. Genes Induced By Allergen (HDM, RWP), But Not Cytokine Treatment**

3

| Symbol                             | Description                                             | RWP  | HDM  | IL-4 + IL-13 |
|------------------------------------|---------------------------------------------------------|------|------|--------------|
| <i>Secreted Epithelial Factors</i> |                                                         |      |      |              |
| Tff2                               | trefoil factor 2 (spasmolytic protein 1)                | 2.8  | 2.5  | 1.2          |
| U46068                             | cDNA sequence U46068                                    | 3.3  | 2.8  | 1.6          |
| <i>Host Immune Response</i>        |                                                         |      |      |              |
| Il1rl1                             | interleukin 1 receptor-like 1                           | 2.5  | 4.9  | 1.0          |
| S100a8                             | S100 calcium binding protein A8 (calgranulin A)         | -1.9 | -2.5 | -1.3         |
| <i>Immunoglobulins</i>             |                                                         |      |      |              |
| Igh-VJ558                          | immunoglobulin heavy chain (J558 family)                | 2.2  | 2.0  | 1.4          |
| Igh-6                              | immunoglobulin heavy chain 6 (heavy chain of IgM)       | 4.7  | 5.9  | -1.1         |
| IgE                                | M.musculus rearranged mRNA for IgE heavy chain C-region | 5.3  | 8.6  | 1.5          |

4

5 7 genes induced in the lung by both HDM and RWP as determined via Venn Analysis (Fig1B).

6 Values represent mean fold-change differences from corresponding controls N= two independent

7 samples per treatment group). Gene expression differences between treatments and

8 corresponding control groups for each of the 3 treatments (HDM, RWP, and IL-4/IL-13) were

9 determined via Student's *t*- test with  $p \geq 0.05$ . The overlapping gene lists were further filtered by10 fold induction of  $\geq 2$ . HDM-house dust mite, RWP-ragweed pollen protein.

11

12

13

14

15

16  
17  
18  
19

**Table E.II. RWP -Induced Gene Expression Patterns in the Mouse Lung**

| Symbol                      | Description                                                        | RWP 72 h |
|-----------------------------|--------------------------------------------------------------------|----------|
| <i>Epithelial Products</i>  |                                                                    |          |
| Arg1                        | arginase 1, liver                                                  | 3.3      |
| Itln2                       | intelectin 2                                                       | 3.7      |
| Muc5ac                      | mucin 5, subtypes A and C, tracheobronchial/gastric                | 2.0      |
| Retnlb                      | resistin like beta                                                 | 2.3      |
| Scin                        | scinderin                                                          | 2.1      |
| Tff2                        | trefoil factor 2 (spasmolytic protein 1)                           | 2.7      |
| <i>Chemokines</i>           |                                                                    |          |
| Ccl8                        | chemokine (C-C motif) ligand 8                                     | 12.9     |
| Ccl9                        | chemokine (C-C motif) ligand 9                                     | 2.7      |
| Ccl11                       | small chemokine (C-C motif) ligand 11                              | 3.7      |
| <i>Inflammation</i>         |                                                                    |          |
| Chi3l3                      | chitinase 3-like 3                                                 | 9.9      |
| Chia                        | chitinase, acidic                                                  | 8.6      |
| Ear2                        | Eosinophil-associated, ribonuclease A family, member 2             | 2.1      |
| Itgax                       | integrin alpha X                                                   | 2.3      |
| <i>Host Immune Response</i> |                                                                    |          |
| Il1rl1                      | interleukin 1 receptor-like 1                                      | 2.5      |
| Pigr                        | polymeric immunoglobulin receptor                                  | 3.3      |
| S100a8                      | S100 calcium binding protein A8 (calgranulin A)                    | -1.9     |
| <i>Antigen Presentation</i> |                                                                    |          |
| Ctss                        | cathepsin S                                                        | 2.1      |
| <i>Matrix Homeostasis</i>   |                                                                    |          |
| Ctsk                        | cathepsin K                                                        | 1.9      |
| Dcn                         | decorin                                                            | -2.0     |
| <i>Protease Pathways</i>    |                                                                    |          |
| Mmp12                       | matrix metalloproteinase 12                                        | 7.2      |
| Mmp12                       | matrix metalloproteinase 12                                        | 5.8      |
| Serpina3g                   | serine (or cysteine) proteinase inhibitor, clade A, member 3G      | 3.3      |
| <i>Arginine Metabolism</i>  |                                                                    |          |
| Gatm                        | glycine amidinotransferase (L-arginine:glycine amidinotransferase) | 2.1      |

|              |                                                                 |      |
|--------------|-----------------------------------------------------------------|------|
|              | <u>Complement Pathway</u>                                       |      |
| C1qa         | complement component 1, q subcomponent, alpha polypeptide       | 2.7  |
| C1qg         | complement component 1, q subcomponent, gamma polypeptide       | 2.3  |
|              | <u>Signaling</u>                                                |      |
| Vav          | vav 1 oncogene                                                  | 4.4  |
|              | <u>Cytoskeleton Organization</u>                                |      |
| Krt1-13      | keratin complex 1, acidic, gene 13                              | -1.9 |
|              | <u>Cell Cycle Control</u>                                       |      |
| Cdkn1c       | cyclin-dependent kinase inhibitor 1C (P57)                      | -1.9 |
| Nupr1        | nuclear protein 1                                               | -1.9 |
|              | <u>Regulation of Gene Expression</u>                            |      |
| Zfp145       | zinc finger protein 145                                         | -4.4 |
|              | <u>Others</u>                                                   |      |
| Crct1        | cysteine-rich C-terminal 1                                      | -2.0 |
| Eprs         | glutamyl-prolyl-tRNA synthetase                                 | -2.2 |
| Esd          | esterase D/formylglutathione hydrolase                          | -2.2 |
| Fbp1         | fructose biphosphatase 1                                        | 2.0  |
| U46068       | cDNA sequence U46068                                            | 3.3  |
|              | <u>Immunoglobulins</u>                                          |      |
| AI324046     | expressed sequence AI324046                                     | 6.8  |
| <u>Fcgbp</u> | Fc fragment of IgG binding protein                              | 4.7  |
| Fcgr2b       | Fc receptor, IgG, low affinity IIb                              | 2.3  |
| Gm1067       | gene model 1067, (NCBI)                                         | 2.0  |
| Igh-1a       | immunoglobulin heavy chain 1a (serum IgG2a)                     | 2.6  |
|              | Clone L2MZB-13.5 immunoglobulin heavy chain variable region     |      |
| Igh-4        | mRNA, partial cds                                               | 3.6  |
|              | M.musculus mRNA for rearranged Ig heavy chain V region (J558    |      |
| Igh-4        | Family) NR10                                                    | 2.4  |
| Igh-         |                                                                 |      |
| V3609N       | immunoglobulin heavy chain (V3609N non-productive)              | 6.5  |
| Igh-         |                                                                 |      |
| V7183        | immunoglobulin heavy chain (V7183 family)                       | 2.5  |
| Igh-         | Clone L2MZB-5.6 immunoglobulin heavy chain variable region      |      |
| VJ558        | mRNA, partial cds /// immunoglobulin heavy chain (J558 family)  | 1.9  |
|              | immunoglobulin kappa chain variable 1 (V1) /// immunoglobulin   |      |
|              | kappa chain variable 1 (V1) /// Clone L2MZB-24.1 immunoglobulin |      |
| Igk-V1       | heavy chain variable region mRNA, partial cds                   | 4.3  |
|              | Mouse Ig aberrantly rearranged kappa-chain region downstream of |      |
| Igk-V28      | J2 gene, from plasmacytoma 3886.                                | 2.5  |
|              | Anti-PC rearranged Ig kappa chain V-J region mRNA, hybridoma    |      |
| Igk-V28      | 31-23-1, partial cds.                                           | 2.7  |

|          |                                                                                                                      |     |
|----------|----------------------------------------------------------------------------------------------------------------------|-----|
| Igk-V8   | immunoglobulin kappa chain variable 8 (V8)                                                                           | 7.5 |
| Igl-V1   | immunoglobulin lambda chain, variable 1                                                                              | 3.1 |
| LOC5630  | Igkappa gene for immunoglobulin kappa chain, partial cds,<br>strain:BDF1. 375.81 monoclonal anti-DNA IgM kappa-chain |     |
| 4        | variable region mRNA, partial cds.                                                                                   | 6.4 |
| MGC608   | Unknown (protein for MGC:60843) immunoglobulin heavy chain 6                                                         |     |
| 43 Igh-6 | (heavy chain of IgM)                                                                                                 | 4.7 |

20

21 Values represent mean fold-change differences from corresponding controls (N= 2 independent

22 samples). Gene expression differences were determined via Student's *t*- test with  $p \geq 0.05$ , and

23 further filtered by a fold induction  $\geq 2$ .

24

25

26

27

28

29 **Table E. III. HDM -Induced Gene Expression Patterns in the Mouse Lung**

| <b>Symbol</b>               | <b>Description</b>                                               | <b>HDM</b> |
|-----------------------------|------------------------------------------------------------------|------------|
| <i>Epithelial Products</i>  |                                                                  |            |
| Agr2                        | anterior gradient 2 ( <i>Xenopus laevis</i> )                    | 4.4        |
| Itn2                        | intelectin 2                                                     | 5.7        |
| Muc5ac                      | <i>Mus musculus</i> Muc5AC-like gene, partial.                   | 3.0        |
| Retnlb                      | resistin like beta                                               | 6.3        |
| Sprr2a                      | small proline-rich protein 2A                                    | 2.9        |
| Sprr2a                      | small proline-rich protein 2A                                    | 3.0        |
| Sprr2b                      | small proline-rich protein 2B                                    | 2.8        |
| Tff2                        | trefoil factor 2 (spasmolytic protein 1)                         | 2.5        |
| <i>Ion Channels</i>         |                                                                  |            |
| Clca3                       | chloride channel calcium activated 3                             | 26.9       |
| Mcoln2                      | mucolipin 2                                                      | 1.9        |
| Slc5a1                      | solute carrier family 5 (sodium/glucose cotransporter), member 1 | 2.7        |
| <i>Chemokines</i>           |                                                                  |            |
| Ccl2                        | chemokine (C-C motif) ligand 2                                   | 5.2        |
| Ccl7                        | chemokine (C-C motif) ligand 7                                   | 2.6        |
| Ccl8                        | chemokine (C-C motif) ligand 8                                   | 23.4       |
| Ccl9                        | chemokine (C-C motif) ligand 9                                   | 5.7        |
| Ccl11                       | small chemokine (C-C motif) ligand 11                            | 8.4        |
| Ccl12                       | chemokine (C-C motif) ligand 12                                  | 2.0        |
| Ccr5                        | chemokine (C-C motif) receptor 5                                 | 4.1        |
| Cxcl1                       | chemokine (C-X-C motif) ligand 1                                 | 4.5        |
| <i>Inflammation</i>         |                                                                  |            |
| Chi3l3                      | chitinase 3-like 3                                               | 10.7       |
| Chia                        | chitinase, acidic                                                | 9.9        |
| Ear2                        | Eosinophil-associated, ribonuclease A family, member 2           | 2.3        |
| Itgax                       | integrin alpha X                                                 | 2.5        |
| Scin                        | scinderin                                                        | 3.1        |
| <i>Host Immune Response</i> |                                                                  |            |
| Cd83                        | CD83 antigen                                                     | 2.6        |
| Il1rl1                      | interleukin 1 receptor-like 1                                    | 4.9        |
| Irf4                        | interferon regulatory factor 4                                   | 2.1        |
| Mrc1                        | mannose receptor, C type 1                                       | 2.8        |
| Ms4a1                       | membrane-spanning 4-domains, subfamily A, member 1               | 2.0        |
| Pigr                        | polymeric immunoglobulin receptor                                | 4.3        |
| S100a8                      | S100 calcium binding protein A8 (calgranulin A)                  | -2.5       |

|           |                                                                    |      |
|-----------|--------------------------------------------------------------------|------|
|           | <i><u>Protease Pathways</u></i>                                    |      |
| Mcpt2     | mast cell protease 2                                               | 2.8  |
| Mmp12     | matrix metalloproteinase 12                                        | 16.6 |
| Serpina3c | serine (or cysteine) proteinase inhibitor, clade A, member 3C      | 2.0  |
| Serpina3g | serine (or cysteine) proteinase inhibitor, clade A, member 3G      | 6.3  |
| Serpina3n | serine (or cysteine) proteinase inhibitor, clade A, member 3N      | 3.2  |
| Tfpi2     | tissue factor pathway inhibitor 2                                  | 2.9  |
|           | <i><u>Arginine Metabolism</u></i>                                  |      |
| Arg1      | arginase 1, liver                                                  | 9.0  |
| Gatm      | glycine amidinotransferase (L-arginine:glycine amidinotransferase) | 4.2  |
|           | <i><u>Complement Pathway</u></i>                                   |      |
| C1qa      | complement component 1, q subcomponent, alpha polypeptide          | 3.5  |
| C1qg      | complement component 1, q subcomponent, gamma polypeptide          | 2.9  |
| C3        | complement component 3                                             | 2.1  |
|           | <i><u>Antigen Presentation</u></i>                                 |      |
| Ctsb      | cathepsin B                                                        | 2.0  |
| Ctsb      | cathepsin B                                                        | 2.0  |
| Ctsz      | cathepsin Z                                                        | 2.7  |
| Ifi30     | interferon gamma inducible protein 30                              | 2.2  |
|           | <i><u>Matrix Homeostasis</u></i>                                   |      |
| Col6a2    | procollagen, type VI, alpha 2                                      | 2.1  |
| Ctsk      | cathepsin K                                                        | 3.2  |
| Ltbp4     | latent transforming growth factor beta binding protein 4           | -2.0 |
|           | <i><u>Lipid Metabolites/ Mediators</u></i>                         |      |
| Alox15    | Arachidonate 15-lipoxygenase                                       | 2.8  |
| Ch25h     | cholesterol 25-hydroxylase                                         | 2.5  |
| Pon1      | paraoxonase 1                                                      | -2.7 |
|           | <i><u>Signaling</u></i>                                            |      |
| F10       | coagulation factor X                                               | 2.1  |
| Fbp1      | fructose biphosphatase 1                                           | 2.7  |
| Mapt      | microtubule-associated protein tau                                 | -2.1 |
| Mapt      | microtubule-associated protein tau                                 | -2.2 |
| Mod1      | malic enzyme, supernatant                                          | 2.2  |
| Pcdha1    | protocadherin alpha 1                                              | -1.9 |
| Tenc1     | tensin like C1 domain-containing phosphatase                       | -2.0 |
|           | <i><u>Cell Growth</u></i>                                          |      |
| Fgf1      | fibroblast growth factor 1                                         | -2.0 |
| Igf1      | insulin-like growth factor 1                                       | 2.4  |
| Igfbp3    | insulin-like growth factor binding protein 3                       | -2.6 |

|           |                                                                                                                                                                                        |      |
|-----------|----------------------------------------------------------------------------------------------------------------------------------------------------------------------------------------|------|
| Thbs1     | thrombospondin 1                                                                                                                                                                       | 2.8  |
|           | <i>Cell Adhesion</i>                                                                                                                                                                   |      |
| Adam8     | a disintegrin and metalloprotease domain 8                                                                                                                                             | 2.1  |
|           | <i>Regulation of Gene Expression</i>                                                                                                                                                   |      |
| Atf3      | activating transcription factor 3                                                                                                                                                      | 2.1  |
| Nr1d1     | nuclear receptor subfamily 1, group D, member 1                                                                                                                                        | -2.0 |
|           | <i>Lysine Metabolism</i>                                                                                                                                                               |      |
| Aass      | aminoadipate-semialdehyde synthase                                                                                                                                                     | 2.8  |
|           | <i>Others</i>                                                                                                                                                                          |      |
| Mest      | mesoderm specific transcript                                                                                                                                                           | 2.3  |
|           | <i>Immunoglobulins and Receptors</i>                                                                                                                                                   |      |
| Fcgbp     | Fc fragment of IgG binding protein                                                                                                                                                     | 5.8  |
| Fcgr2b    | Fc receptor, IgG, low affinity IIb                                                                                                                                                     | 5.4  |
| Igh-VJ558 | immunoglobulin heavy chain (J558 family)                                                                                                                                               | 2.0  |
|           | immunoglobulin kappa chain variable 8 (V8) immunoglobulin kappa chain variable 1 (V1) Nucleosome-reactive monoclonal antibody PR1-3, Ig light chain variable region mRNA, partial cds. | 3.1  |
| Igk-V8    |                                                                                                                                                                                        |      |
| Igk-V1    |                                                                                                                                                                                        |      |
| MGC60843  | Unknown (protein for MGC:60843) immunoglobulin heavy chain 6 (heavy chain of IgM)                                                                                                      | 5.9  |
| Igh-6     |                                                                                                                                                                                        |      |
| U46068    | cDNA sequence U46068                                                                                                                                                                   | 2.8  |
|           | M.musculus rearranged mRNA for IgE heavy chain C-region                                                                                                                                | 8.6  |

30

31 Values represent mean fold-change differences from corresponding controls (N=2 independent

32 samples). Gene expression differences were determined via Student's *t*- test with  $p \geq 0.05$ , and33 further filtered by a fold induction  $\geq 2$ . HDM-house dust mite.

34

35

36

37 **Table E. IV. Differences in HDM and RWP-induced Gene Expression Patterns**  
 38

| Symbol                      | Description                                                         | RWP  | HDM  |
|-----------------------------|---------------------------------------------------------------------|------|------|
| <i>Epithelial Products</i>  |                                                                     |      |      |
| Clca3                       | chloride channel calcium activated 3                                | 41.3 | 26.9 |
| Itln2                       | intelectin 2                                                        | 3.7  | 5.7  |
| Muc5ac                      | mucin 5, subtypes A and C,<br>tracheobronchial/gastric              | 2.1  | 3.0  |
| Retnlb                      | resistin like beta                                                  | 2.5  | 6.3  |
| Slc5a1                      | solute carrier family 5 (sodium/glucose<br>cotransporter), member 1 | 1.5  | 2.7  |
| <i>Chemokines</i>           |                                                                     |      |      |
| Ccl12                       | chemokine (C-C motif) ligand 12                                     | 1.2  | 2.0  |
| Ccl8                        | chemokine (C-C motif) ligand 8                                      | 12.8 | 23.4 |
| Ccl9                        | chemokine (C-C motif) ligand 9                                      | 2.7  | 5.7  |
| Cxcl1                       | chemokine (C-X-C motif) ligand 1                                    | 1.5  | 4.5  |
| Cxcl12                      | chemokine (C-X-C motif) ligand 12                                   | 1.1  | 2.3  |
| Cxcl13                      | chemokine (C-X-C motif) ligand 13                                   | -1.2 | 2.1  |
| Cxcl5                       | chemokine (C-X-C motif) ligand 5                                    | 1.2  | 2.3  |
| Ccl11                       | small chemokine (C-C motif) ligand 11                               | 3.6  | 8.4  |
| <i>Protease Pathways</i>    |                                                                     |      |      |
| Mcpt2                       | mast cell protease 2                                                | 1.5  | 2.8  |
| Mmp12                       | matrix metalloproteinase 12                                         | 7.2  | 16.6 |
| Serpina3g                   | serine (or cysteine) proteinase inhibitor, clade A,<br>member 3G    | 3.3  | 6.3  |
| Serpina3n                   | serine (or cysteine) proteinase inhibitor, clade A,<br>member 3N    | 1.5  | 3.2  |
| Tfpi2                       | tissue factor pathway inhibitor 2                                   | 1.6  | 2.9  |
| <i>Immunoglobulins</i>      |                                                                     |      |      |
| Igh-VJ558                   | immunoglobulin heavy chain (J558 family)                            | 1.8  | 4.9  |
| Igk-V8                      | immunoglobulin kappa chain variable 8 (V8)                          | 1.6  | 3.1  |
| <i>Host Immune Response</i> |                                                                     |      |      |
| Cd52                        | CD52 antigen                                                        | 1.5  | 2.4  |
| Cd83                        | CD83 antigen                                                        | 1.4  | 2.6  |
| C1qb                        | complement component 1, q subcomponent, beta<br>polypeptide         | 2.7  | 3.8  |
| Irf4                        | interferon regulatory factor 4                                      | 1.6  | 2.1  |
| Il1rl1                      | interleukin 1 receptor-like 1                                       | 2.5  | 4.9  |
| Lilrb4                      | leukocyte immunoglobulin-like receptor, subfamily<br>B, member 4    | 1.7  | 3.1  |
| Lilrb4                      | leukocyte immunoglobulin-like receptor, subfamily<br>B, member 4    | 1.8  | 2.6  |



|                                           |                                                                    |      |      |
|-------------------------------------------|--------------------------------------------------------------------|------|------|
| Ly86                                      | lymphocyte antigen 86                                              | 1.4  | 2.4  |
| Spp1                                      | secreted phosphoprotein 1                                          | 1.6  | 2.9  |
| Ifi30                                     | interferon gamma inducible protein 30                              | 1.4  | 2.2  |
| <i><u>Antigen Presentation</u></i>        |                                                                    |      |      |
| Ctss                                      | cathepsin S                                                        | 2.1  | 2.6  |
| Ctsz                                      | cathepsin Z                                                        | 1.5  | 2.7  |
| <i><u>Signaling</u></i>                   |                                                                    |      |      |
| Basp1                                     | brain abundant, membrane attached signal protein 1                 | 1.0  | 2.0  |
| F10                                       | coagulation factor X                                               | 1.4  | 2.1  |
| Creld2                                    | cysteine-rich with EGF-like domains 2                              | 1.2  | 2.1  |
| Lcn2                                      | lipocalin 2                                                        | 1.1  | 2.2  |
| Mod1                                      | malic enzyme, supernatant                                          | 1.4  | 2.2  |
| Mapt                                      | microtubule-associated protein tau                                 | -1.3 | -2.1 |
| Mapt                                      | microtubule-associated protein tau                                 | -1.2 | -2.2 |
| Tgtp                                      | T-cell specific GTPase                                             | -1.1 | 2.8  |
| Tenc1                                     | tensin like C1 domain-containing phosphatase                       | -1.3 | -2.0 |
| Thbs1                                     | thrombospondin 1                                                   | 1.8  | 2.8  |
| <i><u>Matrix Homeostasis</u></i>          |                                                                    |      |      |
| Ctsk                                      | cathepsin K                                                        | 2.0  | 3.2  |
| Col3a1                                    | procollagen, type III, alpha 1                                     | -1.0 | 2.3  |
| Col6a2                                    | procollagen, type VI, alpha 2                                      | 1.4  | 2.1  |
| <i><u>Growth Factors/ Cell Growth</u></i> |                                                                    |      |      |
| Mki67                                     | antigen identified by monoclonal antibody Ki 67                    | 1.2  | 2.8  |
| Igf1                                      | insulin-like growth factor 1                                       | 1.6  | 2.4  |
| Igfbp3                                    | insulin-like growth factor binding protein 3                       | -1.3 | -2.6 |
| Igfbp3                                    | insulin-like growth factor binding protein 3                       | -1.0 | -2.0 |
| Ltbp4                                     | latent transforming growth factor beta binding protein 4           | -1.3 | -2.0 |
| <i><u>Arginine Metabolism Pathway</u></i> |                                                                    |      |      |
| Gclc                                      | glutamate-cysteine ligase, catalytic subunit                       | -1.2 | 2.1  |
| Eprs                                      | glutamyl-prolyl-tRNA synthetase                                    | -2.0 | 1.2  |
| Gatm                                      | glycine amidinotransferase (L-arginine:glycine amidinotransferase) | 2.1  | 4.2  |
| <i><u>Apoptosis</u></i>                   |                                                                    |      |      |
| Atf3                                      | activating transcription factor 3                                  | -1.0 | 2.1  |
| Ctsb                                      | cathepsin B                                                        | 1.4  | 2.0  |
| <i><u>Cell Adhesion</u></i>               |                                                                    |      |      |
| Adam8                                     | a disintegrin and metalloprotease domain 8                         | 1.3  | 2.1  |

|             |                                                                 |      |      |
|-------------|-----------------------------------------------------------------|------|------|
|             | <u>Cell motility</u>                                            |      |      |
| Actb        | actin, beta, cytoplasmic                                        | 2.1  | -1.7 |
| Myh6        | myosin, heavy polypeptide 6, cardiac muscle, alpha              | -2.4 | -1.8 |
| Myl7        | myosin, light polypeptide 7, regulatory                         | -2.2 | -1.9 |
|             | <u>Lipid Metabolites/ Mediators</u>                             |      |      |
| Alox15      | arachidonate 15-lipoxygenase                                    | 1.5  | 2.8  |
| Ch25h       | cholesterol 25-hydroxylase                                      | 1.5  | 2.5  |
| Pon1        | paraoxonase 1                                                   | -1.4 | -2.7 |
|             | <u>Others</u>                                                   |      |      |
| D17H6S56E-5 | DNA segment, Chr 17, human D6S56E 5                             | 1.2  | 2.6  |
| Mest        | mesoderm specific transcript                                    | -1.2 | 2.3  |
| LOC56304    | Single chain Fv antibody fragment scFv 7-10A mRNA, partial cds. | 1.7  | 3.3  |

39

40 Values represent mean fold-change differences from corresponding controls (N= 2 independent

41 samples per treatment). Gene expression differences were determined via Student's *t*- test with42  $p \geq 0.05$ , and further filtered by a fold induction  $\geq 2$ .

43
